# Supplementary material for: The Tomato spotted wilt virus (TSWV) Genome is Differentially Targeted in TSWV-Infected Tomato (Solanum lycopersicum) with or without Sw-5 Gene
Source: PubMed Central journal article supplement (PMC7232525; doi:10.3390/v12040363), 2020-03-26
Supplement: viruses-12-00363-s001.pdf [file viruses-12-00363-s001.pdf]

**Supplementary Table 1.** Primers used to amplify tomato spotted wilt virus and tomato host reference genes by RT-qPCR.

| Gene                                     | Name         | Direction | Sequence 5'-3'            | PCR Product (bp) | Reference  |
|------------------------------------------|--------------|-----------|---------------------------|------------------|------------|
| Polymerase                               | qTSWV-L-4F   | Forward   | GTTGCACGGAATCTTCGCAT      | 123              | This Study |
|                                          | qTSWV-L-4R   | Reverse   | TGCACAGCCCCATAAGCAAA      |                  |            |
| Glycoprotein                             | qTSWV-G-2F   | Forward   | AATGTTCTAACTGTGGCAATTTGTG | 135              | This Study |
|                                          | qTSWV-G-2R   | Reverse   | CGTAGCCGTGATCTGTTCTTTG    |                  |            |
| Movement Protein                         | qTSWV-NSm-F  | Forward   | TCCCAACATGCCATCTGAAAAGC   | 168              | This Study |
|                                          | qTSWV-NSm-R  | Reverse   | ACCCCTTCTGTATTCTTGGCTG    |                  |            |
| Nucleocapsid gene                        | TSWV-N-Rot-F | Forward   | GCTTCCCACCCITTGATTG       | 139              | [38]       |
|                                          | TSWV-N-Rot-R | Reverse   | ATAGCCAAGACAACACTGATC     |                  |            |
| Silencing Suppressor                     | qTSWV-NSs-F  | Forward   | TCCTGCTCAGCTCCACTCTATTG   | 138              | This Study |
|                                          | qTSWV-NSs-R  | Reverse   | TTGACACAAGACAAAAAGCCTCTG  |                  |            |
| Ubiquitin 3                              | UBI-F        | Forward   | TCGTAAGGAGTGCCTAATGCTGA   | 119              | [40]       |
|                                          | UBI-R        | Reverse   | CAATCGCCTCCAGCCTTGTGTAA   |                  |            |
| Glyceraldehyde 3-phosphate dehydrogenase | GAPDH-F      | Forward   | ACCACAAATTGCCTTGCTCCCTTG  | 110              | [40]       |
|                                          | GAPDH-R      | Reverse   | ATCAACGGTCTTCTGAGTGGCTGT  |                  |            |
| Uridylate Kinase                         | UBI-F        | Forward   | TGGTAAGGGCACCCAATGTGCTAA  | 107              | [40]       |
|                                          | UBI-R        | Reverse   | ATCATCGTCCCATTCTCGGAACCA  |                  |            |
| Elongation factor -1 alpha               | EF-1a-F      | Forward   | GATTGGTGGTATTGGAAGTGC     | 129              | [41]       |
|                                          | EF-1a-R      | Reverse   | AGCTTCGTGGTGCATCTC        |                  |            |

**Supplementary Table 2.** Relative absorbance values (average of two wells) at 405 nm from DAS-ELISA of TSWV in younger non-inoculated leaves of resistant cultivar, Red Defender.

| <b>Treatment</b>                | <b>Absorbance at 405 nm at 60 minutes</b> |
|---------------------------------|-------------------------------------------|
| Buffer control                  | 0.094                                     |
| Negative Control                | 0.098                                     |
| TSWV Positive control           | 1.084                                     |
| Red Defender/Buffer/#1/systemic | 0.094                                     |
| Red Defender/Buffer/#2/systemic | 0.094                                     |
| Red Defender/Buffer/#3/systemic | 0.093                                     |
| Red Defender/Buffer/#4/systemic | 0.098                                     |
| Red Defender/Buffer/#6/systemic | 0.092                                     |
| Red Defender/Buffer/#7/systemic | 0.094                                     |
| Red Defender/Buffer/#8/systemic | 0.097                                     |
| Red Defender/Buffer/#5/systemic | 0.095                                     |
| Red Defender/Buffer/#9/systemic | 0.095                                     |
| Red Defender/TSWV/#1/systemic   | 0.096                                     |
| Red Defender/TSWV/#2/systemic   | 0.099                                     |
| Red Defender/TSWV/#3/systemic   | 0.106                                     |
| Red Defender/TSWV/#4/systemic   | 0.104                                     |
| Red Defender/TSWV/#5/systemic   | 0.098                                     |
| Red Defender/TSWV/#6/systemic   | 0.095                                     |
| Red Defender/TSWV/#7/systemic   | 0.098                                     |
| Red Defender/TSWV/#8/systemic   | 0.094                                     |
| Red Defender/TSWV/#9/systemic   | 0.095                                     |
| Red Defender/TSWV/#10/systemic  | 0.099                                     |
| Red Defender/TSWV/#11/systemic  | 0.097                                     |
| Red Defender/TSWV/#12/systemic  | 0.093                                     |
| Red Defender/TSWV/#13/systemic  | 0.088                                     |
| Red Defender/TSWV/#14/systemic  | 0.098                                     |
| Red Defender/TSWV/#15/systemic  | 0.099                                     |
| Red Defender/TSWV/#16/systemic  | 0.101                                     |
| Red Defender/TSWV/#17/systemic  | 0.101                                     |
| Red Defender/TSWV/#18/systemic  | 0.102                                     |
| Red Defender/TSWV/#19/systemic  | 0.095                                     |
| Red Defender/TSWV/#20/systemic  | 0.096                                     |
| Red Defender/TSWV/#21/systemic  | 0.086                                     |
| Red Defender/TSWV/#22/systemic  | 0.105                                     |
| Red Defender/TSWV/#23/systemic  | 0.123                                     |
| Red Defender/TSWV/#24/systemic  | 0.125                                     |
| Red Defender/TSWV/#25/systemic  | 0.127                                     |
| Red Defender/TSWV/#26/systemic  | 0.119                                     |
| Red Defender/TSWV/#27/systemic  | 0.120                                     |

**Supplementary Table 3.** Shapiro-Wilk test output for relative expression of TSWV genes. The Prob < W value listed in the output is the p-value at alpha of 0.05.

| <b>Gene</b> | <b>W</b> | <b>Prob&lt;W</b> |
|-------------|----------|------------------|
| G           | 0.790131 | 0.0478           |
| NSm         | 0.798916 | 0.0575           |
| N           | 0.832862 | 0.1136           |
| NSs         | 0.884421 | 0.3298           |

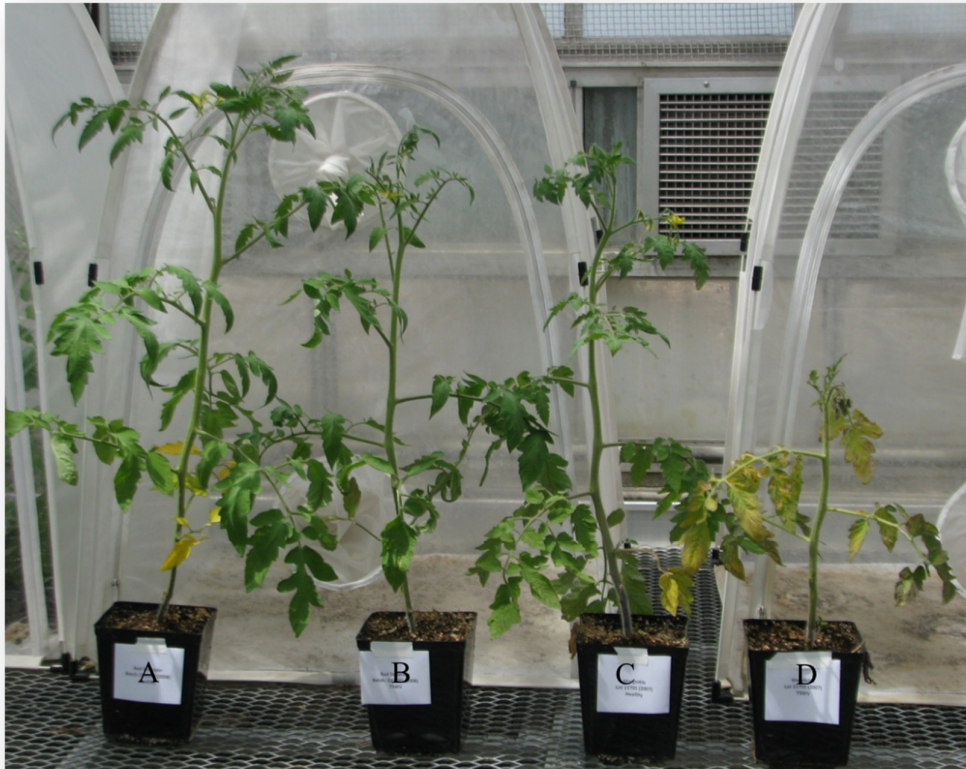

**Supplementary Figure 1.** Effect on growth development of TSWV infection in resistant Red Defender and susceptible Marglobe varieties. A) Mock inoculated resistant genotype; B) TSWV inoculated resistant genotype; C) Mock inoculated susceptible genotype; D) TSWV inoculated susceptible genotype.

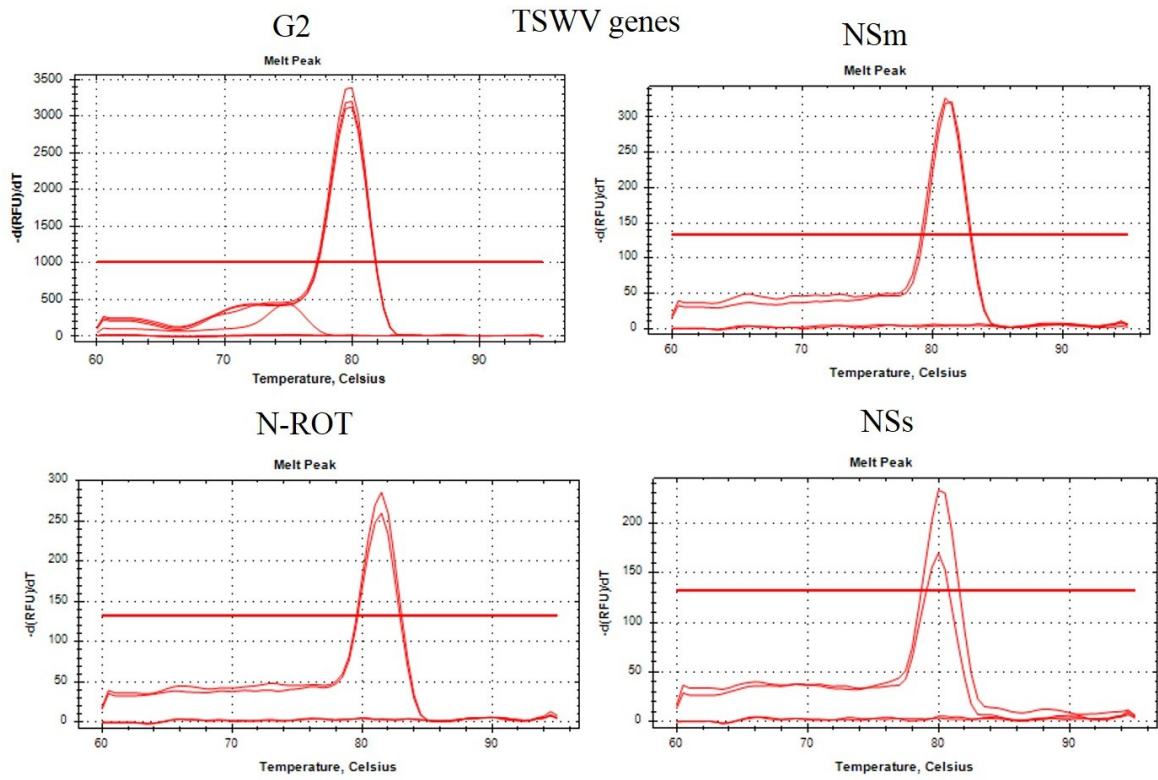

**Supplementary Figure 2 .** Melting curves of tomato spotted wilt virus (TSWV) genes. G2:  $G_N/G_C$  precursor; NSm: cell to cell movement; N-ROT: for the nucleoprotein; NSs: silencing suppressor.
